# Supplementary material for: On the Role of the Carboxyl Group to the Protective Effect of o-dihydroxybenzoic Acids to Saccharomyces cerevisiae Cells upon Induced Oxidative Stress
Source: MDPI journal article supplement (doi:10.3390/antiox11010161), 2022-01-14

# On the Role of the Carboxyl Group to the Protective Effect of *o*-dihydroxybenzoic Acids to *Saccharomyces cerevisiae* Cells upon Induced Oxidative Stress

Nikolaos Nenadis, Efi Samara and Fani Th. Mantzouridou\*

Laboratory of Food Chemistry and Technology, School of Chemistry, Aristotle University of Thessaloniki, 54124, Thessaloniki, Greece; [niknen@chem.auth.gr](mailto:niknen@chem.auth.gr) (N.N.); [efisamara2010@hotmail.com](mailto:efisamara2010@hotmail.com) (E.S.)

\* Correspondence: [fmantz@chem.auth.gr](mailto:fmantz@chem.auth.gr) (F.Th.M); Tel.: (+30-2310-997774)

## Supplementary material

Figure S1: Thermodynamic parameters characterizing the 3,4-diOH-BA scavenging of free radicals according to hydrogen atom transfer (HAT), single-electron transfer–proton transfer (SET-PT) and sequential proton loss electron transfer (SPLET)

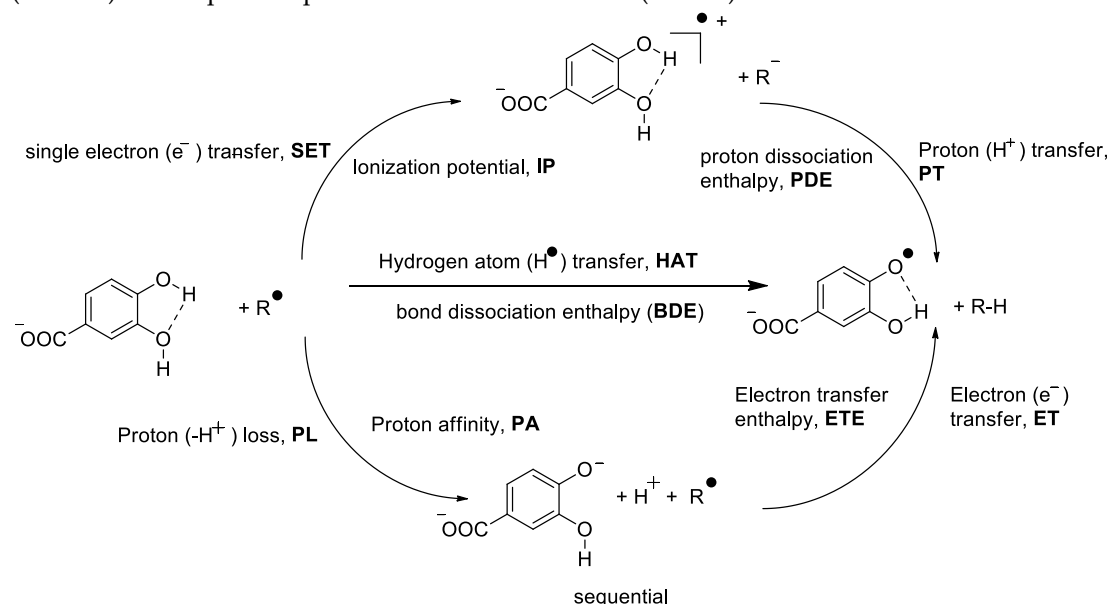

For formula calculation of the thermodynamic parameters see sector 2.10 of the manuscript

Figure S2: Optimized structures of the most stable conformers of tested compounds at B3LYP/6-31+G(d,p) level of theory (aqueous phase)

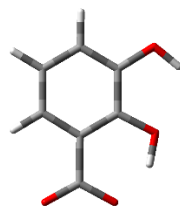

2,3-diOH-BA

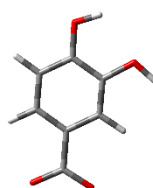

3,4-diOH-BA

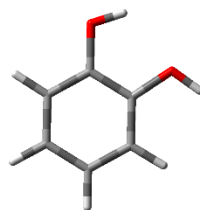

3,4-diOH-B

Figure S3: Computed atomic charge values in the tested compounds at B3LYP/6-31+G(d,p)//B3LYP/6-311++(2d,2p) level of theory (aqueous phase)

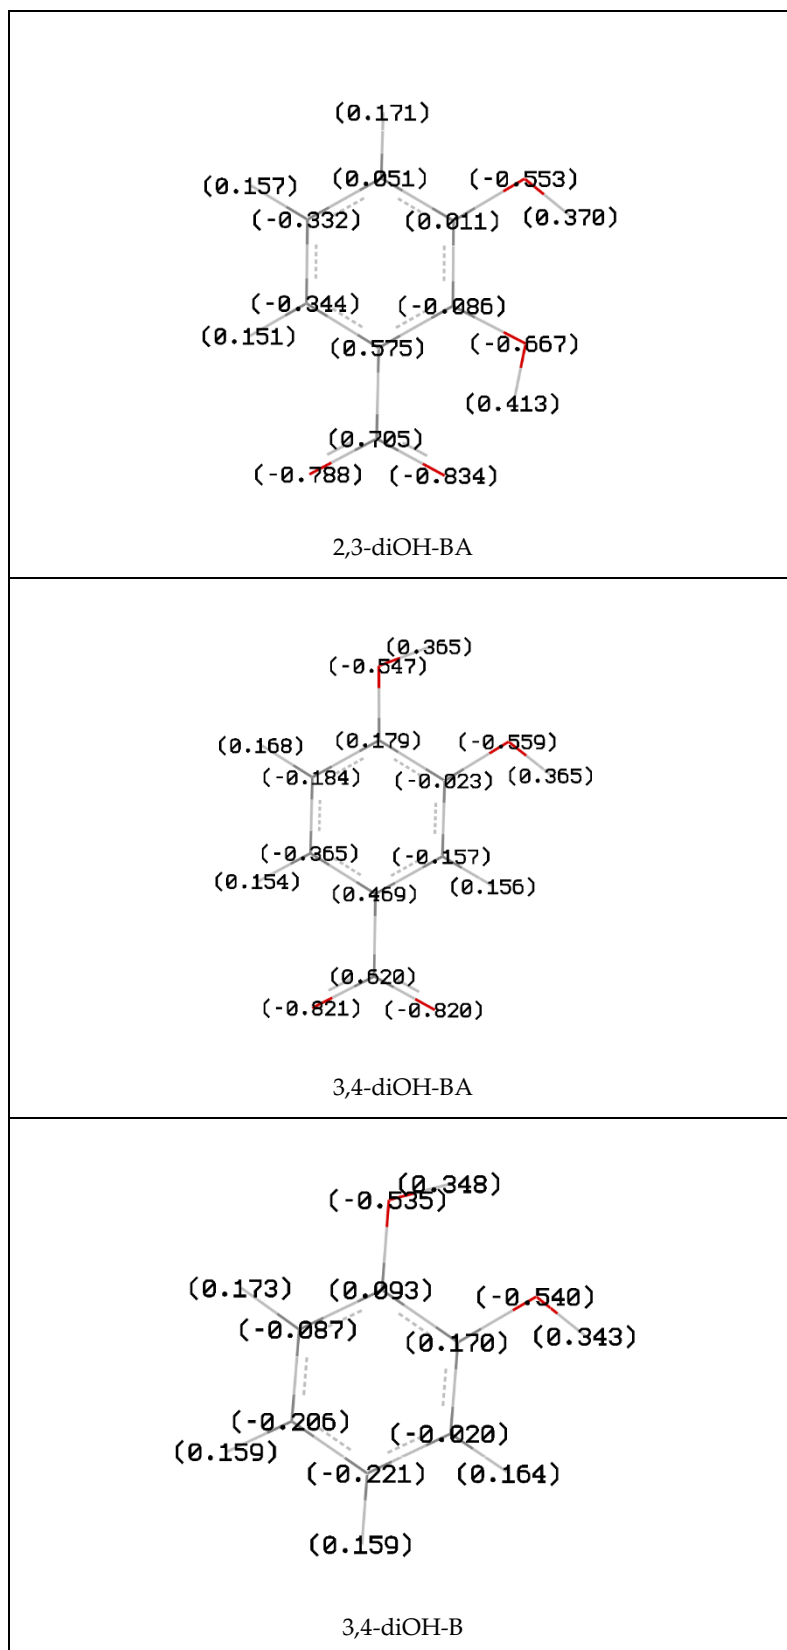

Supplement: s1 [file s1]
